# Supplementary material
Source: PubMed Central journal article supplement (PMC6196517)
Supplement: pnas.1809285115.sapp.pdf [file pnas.1809285115.sapp.pdf]

## Supplementary Information for

Copper inhibits peptidoglycan LD-transpeptidases suppressing  $\beta$ -lactam resistance due to by-pass of Penicillin-binding proteins

Katharina Peters, Manuel Pazos, Zainab Edo, Jean-Emmanuel Hugonnet, Alessandra M. Martorana, Alessandra Polissi, Michael S. VanNieuwenhze, Michel Arthur, Waldemar Vollmer

Waldemar Vollmer  
Email: [w.vollmer@ncl.ac.uk](mailto:w.vollmer@ncl.ac.uk)

### **This PDF file includes:**

Supplementary text  
Figs. S1 to S5  
Tables S1 to S3  
References for SI reference citations

## Supplementary Information Text

### Supplemental Methods

**Peptidoglycan isolation and analysis.** *E. coli* strains were grown either in 750 mL TSB media or TSB media supplemented with  $0.5 \times \text{MIC}$  of  $\text{CuCl}_2$  (3.75 mM),  $\text{CoCl}_2$  (2 mM) or  $\text{NiCl}_2$  (2 mM) to a final  $\text{OD}_{578}$  of 0.6 at  $37^\circ\text{C}$ . For the experiment shown in Fig. S3 (SI Appendix) the BW25113 strain was grown in 500 mL TSB media and in TSB media supplemented with  $0.5 \times \text{MIC}$  of  $\text{CuCl}_2$  (3.75 mM) to a final  $\text{OD}_{578}$  of  $\sim 1.0$  at  $37^\circ\text{C}$ . Cells were cooled on ice for 15 min and collected by centrifugation for 15 min at  $4^\circ\text{C}$  and  $7,000 \times g$ . Cell pellets were resuspended in 7.5 mL cold water and lysed by drop wise addition to 7.5 mL (or 5 mL in case of a starting volume of 500 mL) boiling 8% SDS within 10 min under vigorous stirring. Samples were boiled for further 30 min to ensure complete solubilization of the membranes and degradation of the high molecular weight DNA before storage at  $4^\circ\text{C}$  overnight. Samples were heated for 30 min at  $60^\circ\text{C}$  and collected by centrifugation 60 min at  $90,000 \times g$  at  $28^\circ\text{C}$ . Pellets were washed once with 7.5 mL (or 5 mL in case of a starting volume of 500 mL) of a 3.75 mM copper-chelating triethylenetetramine dihydrochloride (TETA, Santa Cruz Biotechnology) solution prior to the removal of SDS by several washes with warm water. Further PG preparation was performed as previously described (1). Briefly, muropeptides were released from PG by the muramidase cellosyl (Hoechst, Frankfurt am Main, Germany), reduced by sodium borohydride, and separated on a  $250 \times 4.6$  mm  $3 \mu\text{m}$  ProntoSIL 120-3-6C18 AQ reversed phase column (Bischoff, Leonberg, Germany). The eluted muropeptides were detected by their absorbance at 205 nm. The PG composition from exponentially growing cells was analyzed in two biological replicates (Fig. 2; SI Appendix, Fig. S4, Table S2 and Table S3), the PG from stationary cells in three biological replicates (SI Appendix, Fig. S3). The muropeptide fraction of TriLysArg was collected and analyzed at the Newcastle University Pinnacle facility as described previously (2).

**Optimization of in situ labeling of PG with HADA.** We labeled the wt and the  $\Delta 6\text{LDT}$  cells with HADA using the published procedure (3, 4). The cells were grown to an exponential phase and a long-term-pulse labeling with the FDAA hydroxyl coumarine-carbonyl amino-D-alanine (HADA) was performed. The excess of dye was removed by 3 washes with  $1 \times \text{PBS}$  (pH 7.4). The cells were fixed with 3% paraformaldehyde and analyzed under the microscope. Sacculi were extracted from the same cell cultures to ensure that the discovered localization signal of HADA is also visible in the sacculi and to exclude that the detected signals are due to artefacts. Using the published procedure wt cells were completely labeled, but constricting wt cells lacked a signal at the septum, while in  $\Delta 6\text{LDT}$  cells no signal could be detected (see Fig. S5A, image 1). Wild-type sacculi showed the same uniform labeling signal and the lack of signal at the septum of constricting cells, while no signal could be detected in  $\Delta 6\text{LDT}$  sacculi (Fig. S5B, image 1).

We optimized the procedure with the following washing steps. One-tenth of the final volume of  $10 \times$  sodium citrate buffer (pH 2.25) were added to the growing cultures, followed by one wash step with  $1 \times$  sodium citrate buffer (pH 3.0) and two wash steps with PBS (pH 7.5). All wash steps were performed at  $4^\circ\text{C}$ . Using this optimized protocol wt cells were completely labeled, with a stronger signal at the septum of constricting cells (see Fig. S5A, image 2). The same signal was obtained in purified wt sacculi (Fig. S5B, image 2). Interestingly, in  $\Delta 6\text{LDT}$  cells the signals were detected at the septum of constricting cells (Fig. S5A, image 2) and the analysis of the sacculi of those labeled cells confirmed this result (Fig. S5B, image 2). This is realistic, since in the wt strain the HADA incorporation is performed by PBPs and LD-TPases, resulting in the labeled side-wall and in the strong signal at the septum of constricting cells. In  $\Delta 6\text{LDT}$  cells HADA is incorporated by the PBPs which are active at the cell septum resulting in the defined localization signal at the septum of constricting cells.

When we grew the wt and  $\Delta 6\text{LDT}$  cells in the presence of  $0.5 \times \text{MIC}$  of  $\text{CuCl}_2$  (3.75 mM) and performed a long pulse labeling with HADA and removed the excess of dye using 3

washing steps with PBS (pH 7.5) there was a high background signal that impeded the detection of the cellular signal. Adding  $10 \times$  sodium citrate buffer (pH 2.25) to the cells prior washing once with  $1 \times$  sodium citrate buffer (pH 3.0) and twice with PBS (pH 7.5) improved the detection of the cellular signal, but the background fluorescence was still high.

Therefore we further optimized the washing steps, including one wash step with 7.5 mM triethylenetetramine dihydrochloride (TETA; copper chelating agent) with either pH of 7.5 (Fig. S5A, image 3) or 3.0 (Fig. S5A, image 4). When wt cells were washed once with 7.5 mM TETA pH 7.5 and twice with PBS (pH 7.5) they showed empty septa as in the published procedure (3, 4) while the  $\Delta 6LDT$  cells were unlabeled (Fig. S5A, image 3). By contrary, when the cells were washed once with 7.5 mM TETA pH 3.0 and twice with PBS (pH 7.5) the wt cells showed peripheral and septal labels and  $\Delta 6LDT$  cells a clear septal label (Fig. S5A, image 4).

These results suggest that the washes with low pH buffer (either sodium citrate buffer or TETA solution) improves the removal of excessive HADA, decreasing the background fluorescence signal and thus improves signal detection. In addition, the acidic pH improves the septal signal presumably by preventing the removal of incorporated HADA by DD-carboxypeptidases (5, 6).

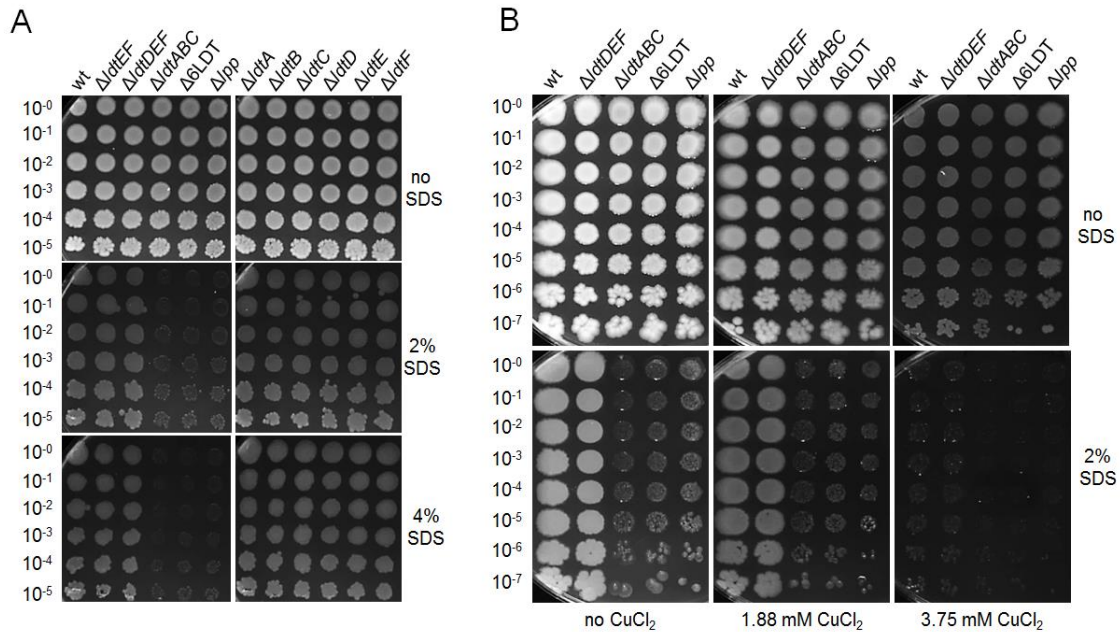

**Fig. S1.** Sensitivity of *ldt* and *lpp* mutants to SDS and CuCl<sub>2</sub>. **(A)** SDS sensitivity of *ldt* and *lpp* mutants. Overnight cultures of *E. coli* BW25113 (wt), BW25113 $\Delta ldtEF$ , BW25113 $\Delta ldtDEF$ , BW25113 $\Delta ldtABC$ , BW25113 $\Delta 6LDT$ , BW25113 $\Delta lpp$  and the single LDT mutants BW25113 $\Delta ldtA$ , BW25113 $\Delta ldtB$ , BW25113 $\Delta ldtC$ , BW25113 $\Delta ldtD$ , BW25113 $\Delta ldtE$  and BW25113 $\Delta ldtF$  were adjusted to an equal optical density and serial dilutions were spotted on TSB plates without or with 2 or 4% SDS. Plates were incubated at 37°C for 24 h. Representative results of 3 independent experiments are shown. **(B)** Copper impairs the integrity of the cell envelope. Overnight cultures of *E. coli* BW25113 (wt), BW25113 $\Delta ldtABC$ , BW25113 $\Delta ldtDEF$ , BW25113 $\Delta 6LDT$  and BW25113 $\Delta lpp$  were adjusted to an equal optical density and serial dilutions were spotted on TSB plates with or without 2% SDS, containing no CuCl<sub>2</sub>, 1.88 mM or 3.75 mM CuCl<sub>2</sub> (0, 0.25 and 0.5  $\times$  MIC, respectively). Plates were incubated at 37°C for 48 h. Representative results of 3 independent experiments are shown.

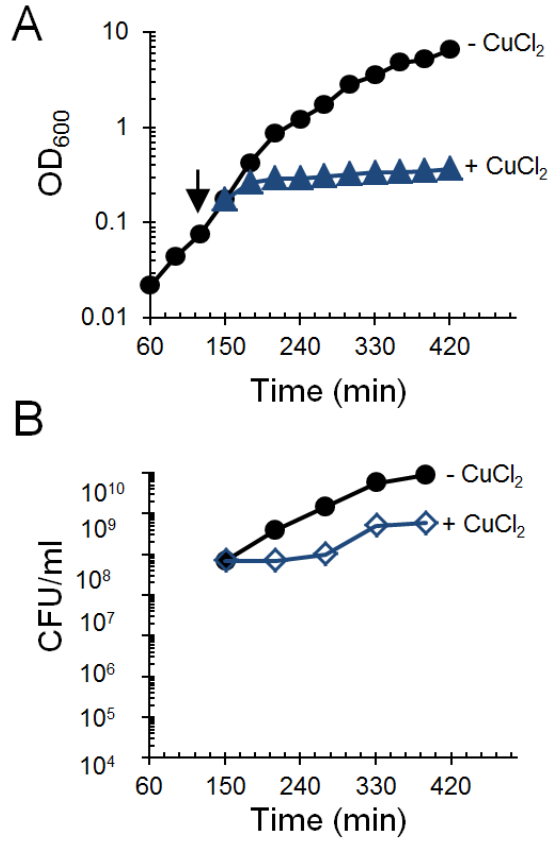

**Fig. S2.** Growth and viability of the wt strain in the presence and absence of copper. BW25113 cells were grown to an OD<sub>600</sub> of 0.2 in LD medium. Cells were harvested, washed three times in LD and diluted 1/100 in LD medium. When cells reach an OD<sub>600</sub> of 0.1 the cultures were split and 3.75 mM CuCl<sub>2</sub> was added (arrow). **(A)** Cell growth was monitored by OD<sub>600</sub> measurements. **(B)** Viability was assessed by determining the colony forming units (CFU).

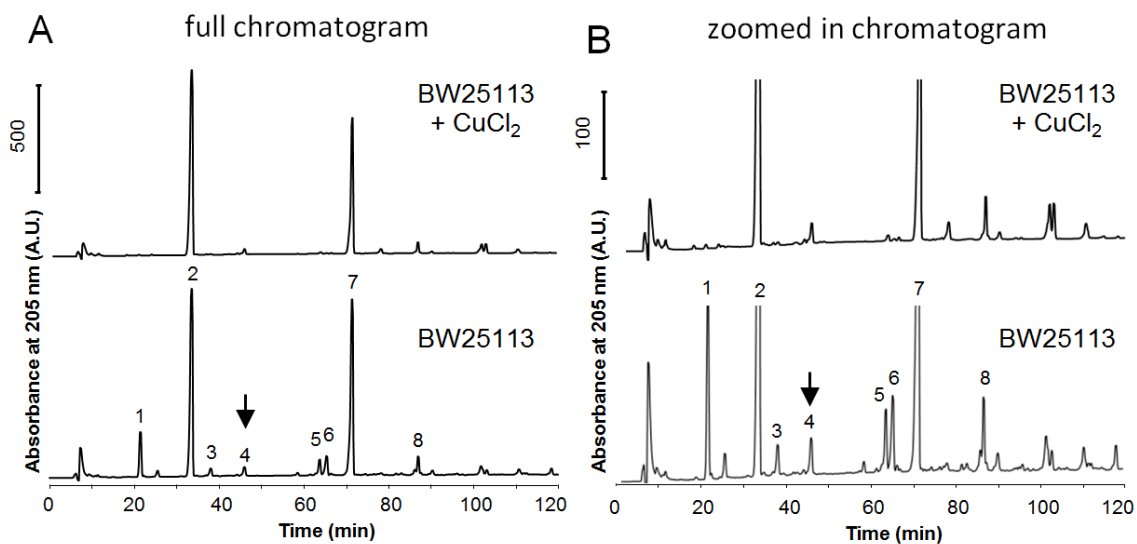

**Fig. S3.** Effect of copper on the muropeptide composition of stationary cells of *E. coli* BW25113. (A) Full muropeptide profiles and (B) zoomed in muropeptide profiles of *E. coli* BW25113 grown in the presence of  $0.5 \times \text{MIC}$  of  $\text{CuCl}_2$  or without  $\text{CuCl}_2$ . The detected muropeptides are numbered. 1, Tri; 2, Tetra; 3, Di; 4, TriLysArg (arrow); 5, TriTetra(3-3); 6, TetraTri(4-3); 7, TetraTetra(4-3); 8, TetraTetraTetra(4-3). The TriLysArg fraction was collected and the mass of the reduced muropeptide was confirmed by HPLC-LTQ-FT mass spectrometry as previously described (2). Calculated monoisotopic neutral mass: 1154.5667 Da; observed mass: 1154.5676 Da).

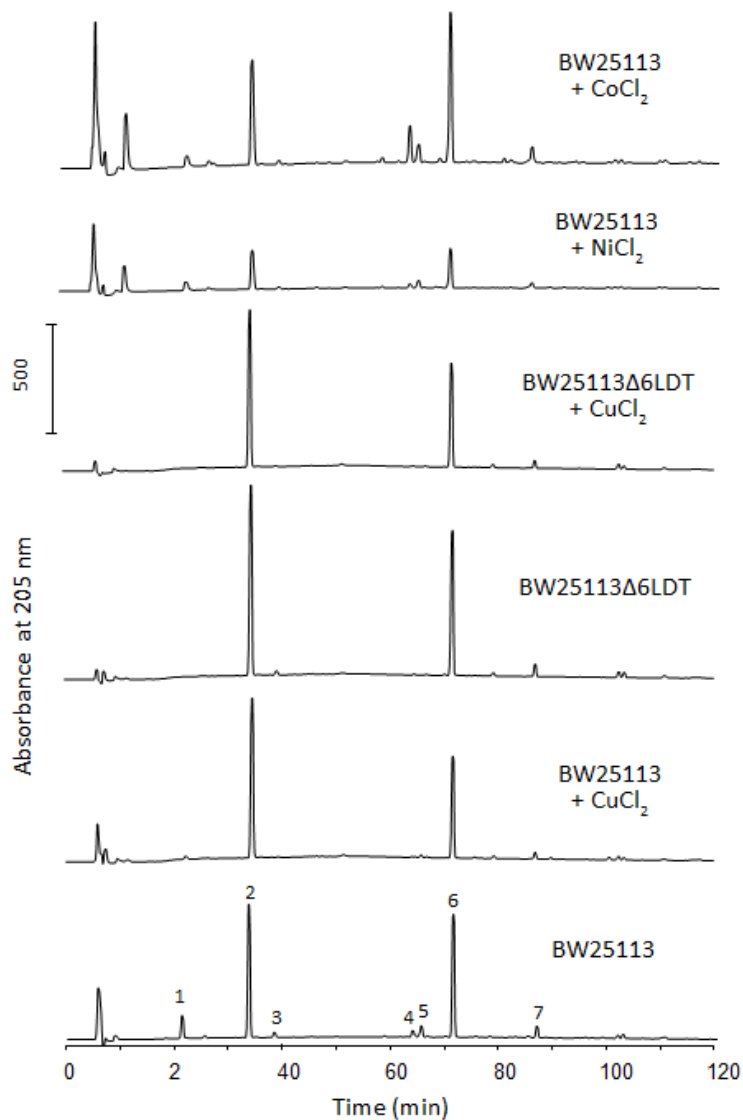

**Fig. S4.** Effects of metal ions on the mucopeptide composition of *E. coli* cells. Mucopeptide profiles of BW25113 and BW25113Δ6LDT in the presence of  $0.5 \times \text{MIC}$  of CuCl<sub>2</sub>, NiCl<sub>2</sub> or CoCl<sub>2</sub> or without metal ion. The mucopeptides are numbered. 1, Tri; 2, Tetra; 3, Di; 4, TriTetra(3-3); 5, TetraTri(4-3); 6, TetraTetra(4-3); 7, TetraTetraTetra.

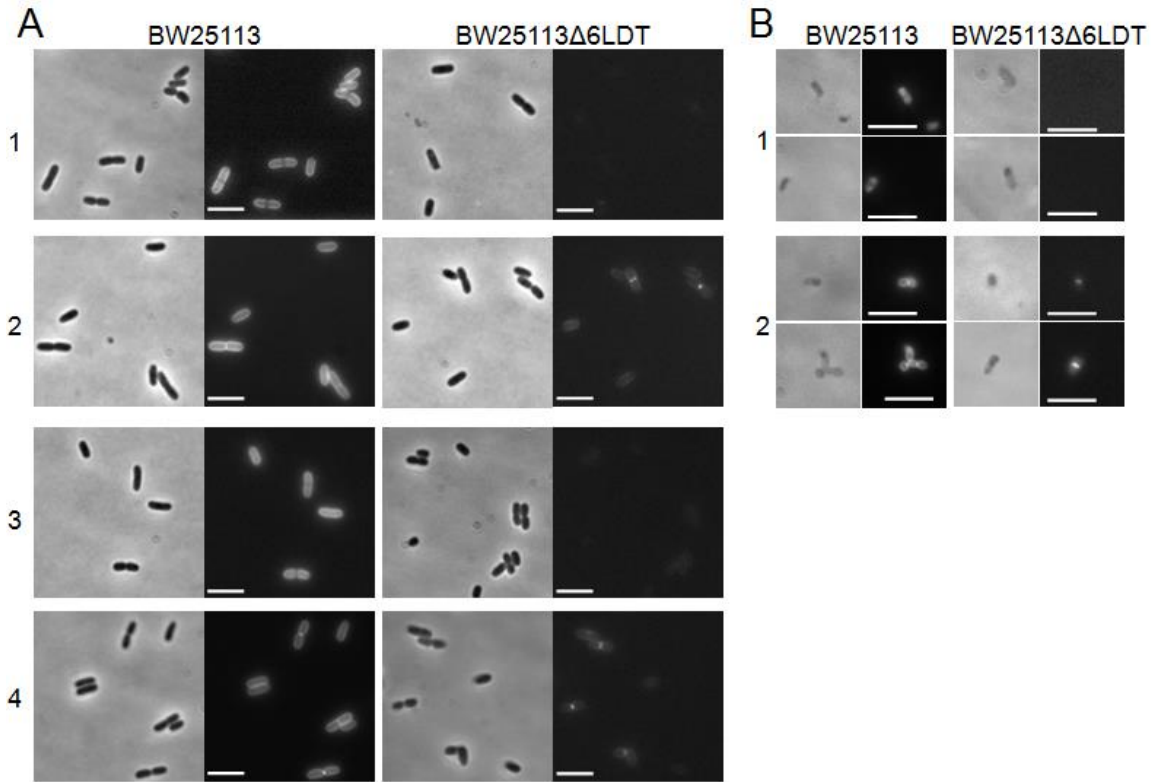

**Fig. S5.** Optimized HADA labeling of *E. coli* BW25113 and BW25113Δ6LDT cells. BW25113 and BW25113Δ6LDT cells were incubated with 250  $\mu$ M HADA for 30 min (long pulse labeling). The excess of HADA was removed by different washing procedures (all performed 4°C). 1: 3 washes with phosphate buffered saline (PBS) (published procedure); 2: addition of 1/10 of the final volume of 10  $\times$  sodium citrate buffer (805 mM citric acid, 410 mM NaOH, 1.19 M NaCl pH 2.25) to the cell culture prior to one washing step with 1  $\times$  sodium citrate buffer (pH 3.0), two washing step with PBS; 3: 1 washing step with 7.5 mM TETA in PBS (pH 7.5), two washes with PBS; 4: 1 washing step with 7.5 mM TETA (pH 3.0) and two washes with PBS. (A) After the washing steps cells were fixed with 3% paraformaldehyde. (B) Sacculi were isolated from the washed cells and samples applied onto polylysine coated slides. The cells and sacculi were visualized by phase contrast (left) and fluorescence microscopy using the DAPI channel (left). Bar, 2  $\mu$ m.



**Table S1. Bacterial strains.**

| Strain                                        | Relevant genotype or description <sup>a</sup>                                                                                                                                                                      | Source or reference |
|-----------------------------------------------|--------------------------------------------------------------------------------------------------------------------------------------------------------------------------------------------------------------------|---------------------|
| <i>E. coli</i>                                |                                                                                                                                                                                                                    |                     |
| BW25113                                       | <i>lacI<sup>q</sup> rrnB<sub>T14</sub> ΔlacZ<sub>WJ16</sub> hsdR514 ΔaraBAD<sub>AH33</sub> ΔrhaBAD<sub>LD78</sub></i>                                                                                              | (7)                 |
| AMM28                                         | BW25113Δ <i>ldtD</i> :: <i>frr</i> Δ <i>ldtE</i> :: <i>frr</i> Δ <i>ldtF</i> :: <i>frr</i> , Kan <sup>S</sup>                                                                                                      | A. Polissi          |
| AMM14                                         | BW25113 Δ <i>ldtA</i> :: <i>frr</i> Δ <i>ldtB</i> :: <i>frr</i> Δ <i>ldtC</i> :: <i>frr</i> , Kan <sup>S</sup>                                                                                                     | A. Polissi          |
| BB-3                                          | BW25113 Φ( <i>kan araC araBplptC</i> )1                                                                                                                                                                            | (8)                 |
| BW25113Δ6LDT                                  | BW25113 Δ <i>ldtA</i> :: <i>frr</i> Δ <i>ldtB</i> :: <i>frr</i> Δ <i>ldtC</i> :: <i>frr</i> Δ <i>ldtD</i> :: <i>frr</i> Δ <i>ldtE</i> :: <i>frr</i> Δ <i>ldtF</i> :: <i>frr</i> , Kan <sup>S</sup>                 | (9)                 |
| BW25113Δ <i>lpp</i>                           | BW25113Δ <i>lpp</i> :: <i>kan</i> , Kan <sup>R</sup>                                                                                                                                                               | (10)                |
| BW25113Δ <i>erfK</i>                          | BW25113Δ <i>ldtA</i> :: <i>kan</i> , Kan <sup>R</sup>                                                                                                                                                              | (10)                |
| BW25113Δ <i>ybiS</i>                          | BW25113Δ <i>ldtB</i> :: <i>kan</i> , Kan <sup>R</sup>                                                                                                                                                              | (10)                |
| BW25113Δ <i>ycfS</i>                          | BW25113Δ <i>ldtC</i> :: <i>kan</i> , Kan <sup>R</sup>                                                                                                                                                              | (10)                |
| BW25113Δ <i>ycbB</i>                          | BW25113Δ <i>ldtD</i> :: <i>kan</i> , Kan <sup>R</sup>                                                                                                                                                              | (10)                |
| BW25113Δ <i>ynhG</i>                          | BW25113Δ <i>ldtE</i> :: <i>kan</i> , Kan <sup>R</sup>                                                                                                                                                              | (10)                |
| BW25113Δ <i>yafK</i>                          | BW25113Δ <i>ldtF</i> :: <i>kan</i> , Kan <sup>R</sup>                                                                                                                                                              | (10)                |
| BW25113 M1                                    | BW25113Δ4 pJEH11( <i>ldtD</i> ), selection for Amp <sup>R</sup> in presence of IPTG, Δ <i>ldtA</i> Δ <i>ldtB</i> Δ <i>ldtC</i> Δ <i>ldtC</i> , Amp <sup>R</sup> , CTX <sup>R</sup>                                 | (11)                |
| BW25113 pTRC99aΩ <i>bla</i> <sub>TEM116</sub> | pTRC99aΩ <i>bla</i> <sub>TEM116</sub> : <i>trcP</i> vector, <i>luc14</i> , pUC18 <i>EcoRI</i> - <i>HindIII</i> polylinker region, <i>bla</i> <sub>TEM116</sub> encoding the beta-lactamase (TEM116)                | M. Arthur           |
| <i>E. faecium</i>                             |                                                                                                                                                                                                                    |                     |
| D344R                                         | clinical isolate, highly Amp <sup>R</sup> , Ery <sup>R</sup> , Tet <sup>R</sup> , production of low affinity PBP5 <sub>fm</sub>                                                                                    | (12)                |
| M512                                          | Amp <sup>R</sup> , spontaneous mutant derived from D344S by five serial selection steps on agar containing increasing concentrations of ampicillin. D344S is a derivative of D344R lacking the gene encoding PBP5. | (13)                |

<sup>a</sup>Antibiotic resistance markers: Amp, ampicillin; CTX, ceftriaxone; Ery, erythromycin; Kan, kanamycin; Tet, tetracycline.

**Table S2. Effect of copper chloride on the muuropeptide composition of *E. coli*.**

| Muuropeptide           | No | Relative peak area (%) <sup>1</sup> |                                |                  |                                         |
|------------------------|----|-------------------------------------|--------------------------------|------------------|-----------------------------------------|
|                        |    | BW25113                             | BW25113 +<br>CuCl <sub>2</sub> | BW25113<br>Δ6LDT | BW25113<br>Δ6LDT<br>+ CuCl <sub>2</sub> |
| <b>Tri</b>             | 1  | <b>7.3 ± 0.1</b>                    | <b>0.7 ± 0.7</b>               | <b>0.0 ± 0.0</b> | <b>0.0 ± 0.0</b>                        |
| <b>Tetra</b>           | 2  | 42.8 ± 0.0                          | 60.6 ± 0.2                     | 54.4 ± 0.1       | 60.8 ± 1.4                              |
| <b>Di</b>              | 3  | 1.8 ± 0.0                           | 0.0 ± 0.0                      | 1.3 ± 0.1        | 0.0 ± 0.0                               |
| <b>TriTetra(3-3)</b>   | 4  | <b>2.0 ± 0.1</b>                    | <b>0.0 ± 0.0</b>               | <b>0.0 ± 0.0</b> | <b>0.0 ± 0.0</b>                        |
| <b>TetraTri(4-3)</b>   | 5  | <b>4.1 ± 0.1</b>                    | <b>0.5 ± 0.5</b>               | <b>0.0 ± 0.0</b> | <b>0.0 ± 0.0</b>                        |
| <b>TetraTetra(4-3)</b> | 6  | 38.6 ± 0.3                          | 35.9 ± 1.2                     | 41.1 ± 0.0       | 36.9 ± 1.2                              |
| <b>TetraTetraTetra</b> | 7  | 3.3 ± 0.0                           | 2.4 ± 0.1                      | 3.2 ± 0.2        | 2.3 ± 0.2                               |

<sup>1</sup>The values are means ± variation of two independent peptidoglycan preparations. Peak areas were quantified with the software Laura (Lab Logic Systems Ltd) and are given as percentage of all known peaks. Bold values highlight muuropeptides with tripeptides and/or 3-3 cross-links which are affected due to the presence of CuCl<sub>2</sub>. Strain BW25113Δ6LDT does not contain tripeptides or 3-3 cross-links.

**Table S3. Effect of nickel and cobalt ions on the muropeptide composition of *E. coli*.**

| Muropeptide            | No | Relative peak area (%) <sup>1</sup> |                     |                     |
|------------------------|----|-------------------------------------|---------------------|---------------------|
|                        |    | BW25113                             | BW25113             | BW25113             |
|                        |    |                                     | + NiCl <sub>2</sub> | + CoCl <sub>2</sub> |
| <b>Tri</b>             | 1  | <b>7.4</b>                          | <b>11.6</b>         | <b>5.2</b>          |
| <b>Tetra</b>           | 2  | 42.4                                | 38.0                | 33.5                |
| <b>Di</b>              | 3  | 1.8                                 | 2.0                 | 1.1                 |
| <b>TriTetra(3-3)</b>   | 4  | <b>2.4</b>                          | <b>4.4</b>          | <b>9.9</b>          |
| <b>TetraTri(4-3)</b>   | 5  | <b>3.9</b>                          | <b>7.6</b>          | <b>5.8</b>          |
| <b>TetraTetra(4-3)</b> | 6  | 38.3                                | 32.1                | 39.5                |
| <b>TetraTetraTetra</b> | 7  | 3.7                                 | 4.4                 | 5.0                 |

<sup>1</sup>Peak areas were quantified with the software Laura (Lab Logic Systems Ltd) and are given as percentage of all known peaks. Bold values highlight the changes in muropeptides containing tripeptides and/or 3-3 cross-links in BW25113 cells due to the presence of the respective metal.

## References

1. Glauner B (1988) Separation and quantification of mucopeptides with high-performance liquid chromatography. *Anal Biochem* 172(2):451-464.
2. Bui NK, et al. (2009) The peptidoglycan sacculus of *Myxococcus xanthus* has unusual structural features and is degraded during glycerol-induced myxospore development. *J Bacteriol* 191(2):494-505.
3. Kuru E, et al. (2012) *In Situ* probing of newly synthesized peptidoglycan in live bacteria with fluorescent D-amino acids. *Angew Chem Int Ed Engl* 51(50):12519-12523.
4. Kuru E, Tekkam S, Hall E, Brun YV, VanNieuwenhze MS (2015) Synthesis of fluorescent D-amino acids and their use for probing peptidoglycan synthesis and bacterial growth *in situ*. *Nat Protoc* 10(1):33-52.
5. Amanuma H, Strominger JL (1980) Purification and properties of penicillin-binding proteins 5 and 6 from *Escherichia coli* membranes. *J Biol Chem* 255(23):11173-11180.
6. Stefanova ME, Davies C, Nicholas RA, Gutheil WG (2002) pH, inhibitor, and substrate specificity studies on *Escherichia coli* penicillin-binding protein 5. *Biochim Biophys Acta* 1597(2):292-300.
7. Datsenko KA, Wanner BL (2000) One-step inactivation of chromosomal genes in *Escherichia coli* K-12 using PCR products. *Proc Natl Acad Sci U S A* 97(12):6640-6645.
8. Sperandeo P, Pozzi C, Deho G, Polissi A (2006) Non-essential KDO biosynthesis and new essential cell envelope biogenesis genes in the *Escherichia coli* *yrbG-yhbG* locus. *Res Microbiol* 157(6):547-558.
9. Kuru E, et al. (2017) Fluorescent D-amino-acids reveal bi-cellular cell wall modifications important for *Bdellovibrio bacteriovorus* predation. *Nat Microbiol* 2(12):1648-1657.
10. Baba T, et al. (2006) Construction of *Escherichia coli* K-12 in-frame, single-gene knockout mutants: the Keio collection. *Mol Syst Biol* 2:2006 0008.
11. Hugonnet JE, et al. (2016) Factors essential for L,D-transpeptidase-mediated peptidoglycan cross-linking and beta-lactam resistance in *Escherichia coli*. *eLife* 5:pii: e19469. doi: 10.7554/eLife.19469.
12. Zorzi W, et al. (1996) Structure of the low-affinity penicillin-binding protein 5 PBP5fm in wild-type and highly penicillin-resistant strains of *Enterococcus faecium*. *J Bacteriol* 178(16):4948-4957.
13. Mainardi JL, et al. (2002) Balance between two transpeptidation mechanisms determines the expression of beta-lactam resistance in *Enterococcus faecium*. *J Biol Chem* 277(39):35801-35807.
